# Supplementary material for: CD99 is a potential diagnostic and immunological biomarker in pan-cancer
Source: Research Square preprint supplement (doi:10.21203/rs.3.rs-6034149/v1), 2025-04-18
Supplement: Supplementary file 1 [file c8fe84620df3664b114efd99.docx]

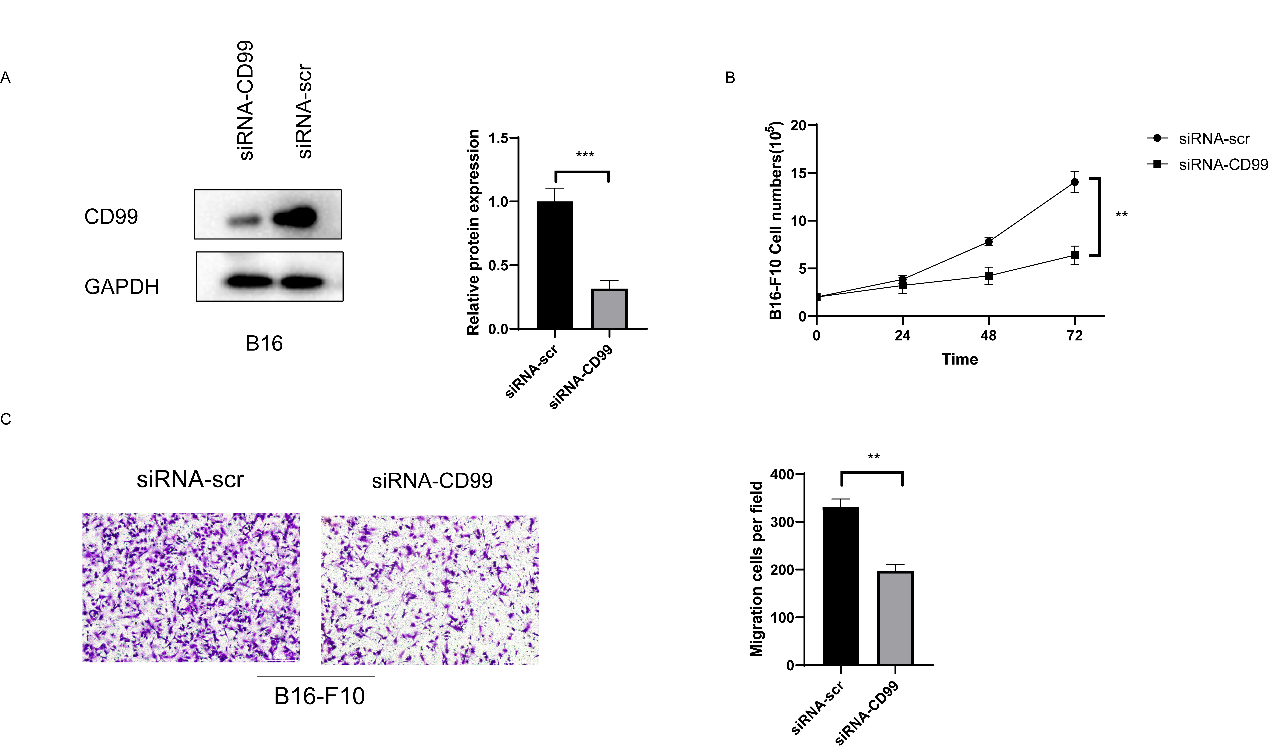


**Supplementary Fig. 1** The role of CD99 in B16-F10 cells. (A) Western blot analysis of CD99 expression in B16-F10 cells after they were transfected with siRNA-CD99. (B) Proliferation assay to evaluate the cell count of B16-F10 cells following siRNA-CD99 transfection. (C) Transwell assay to assess the migration capacity of B16-F10 cells after they were transfected with siRNA-CD99. **, *P*<0.01; ***, *P*<0.001.


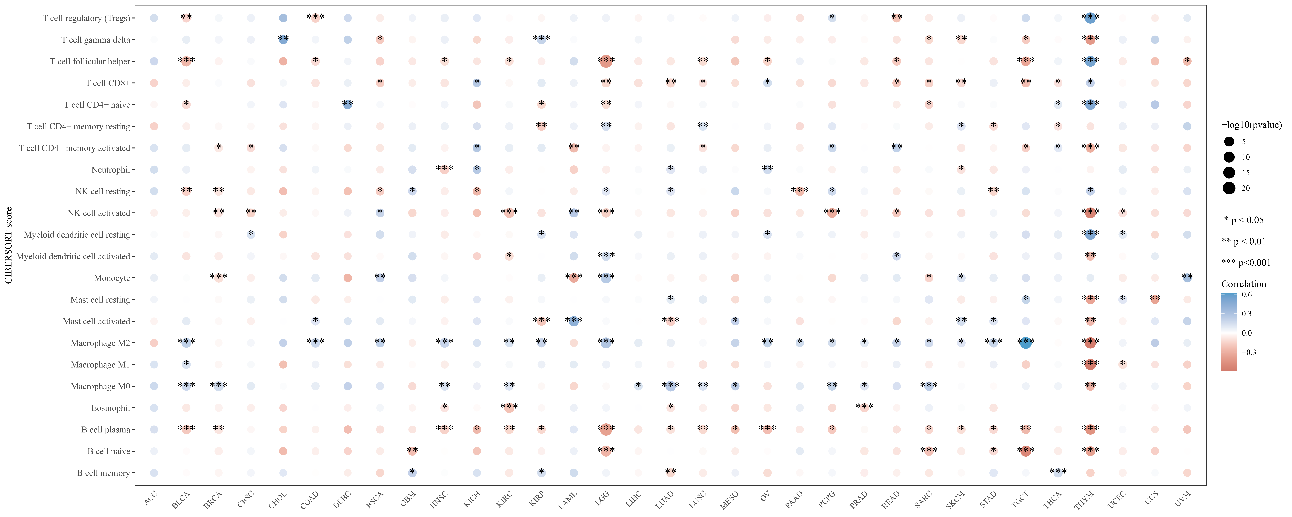


**Supplementary Fig. 2** The relationship between CD99 expression and tumor-infiltrating immune cells in pan-cancer by CIBERSORT. *, *P*<0.05; **, *P*<0.01; ***, *P*<0.001.


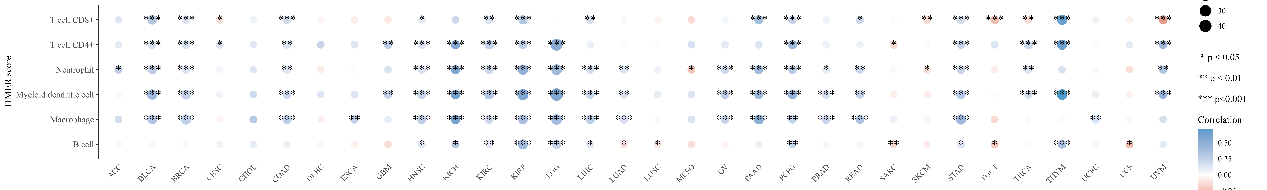


**Supplementary Fig. 3** The relationship between CD99 expression and tumor-infiltrating immune cells in pan-cancer by TIMER. *, *P*<0.05; **, *P*<0.01; ***, *P*<0.001.


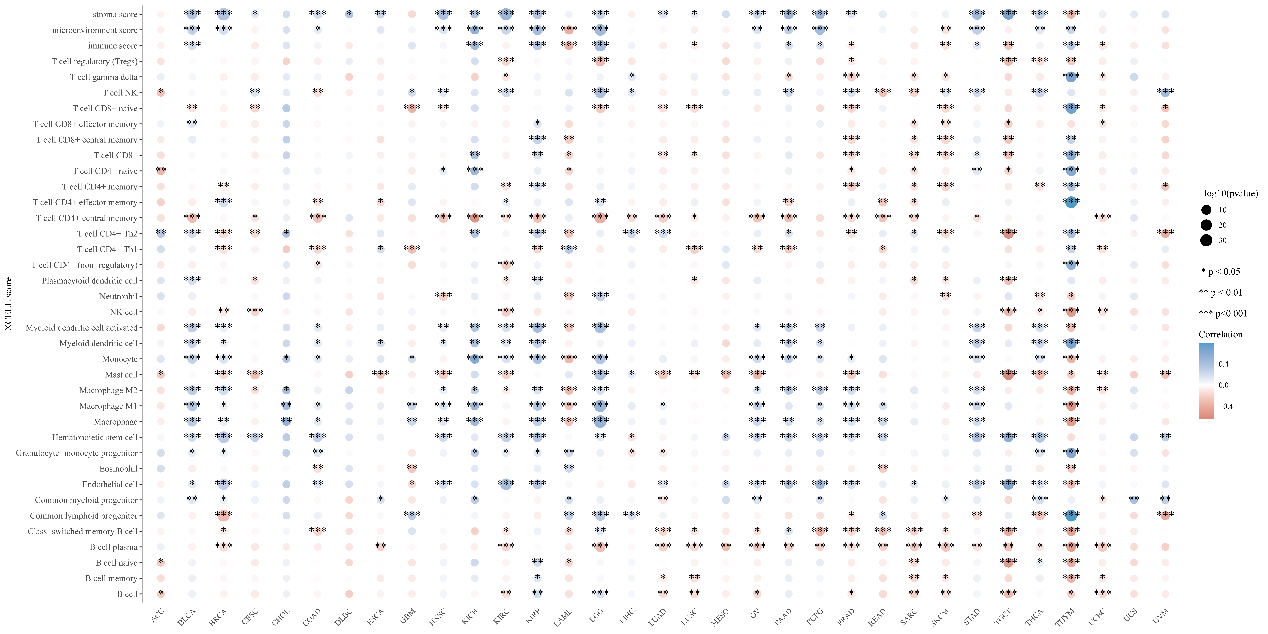


**Supplementary Fig. 4** The relationship between CD99 expression and tumor-infiltrating immune cells in pan-cancer by xCELL. *, *P*<0.05; **, *P*<0.01; ***, *P*<0.001.


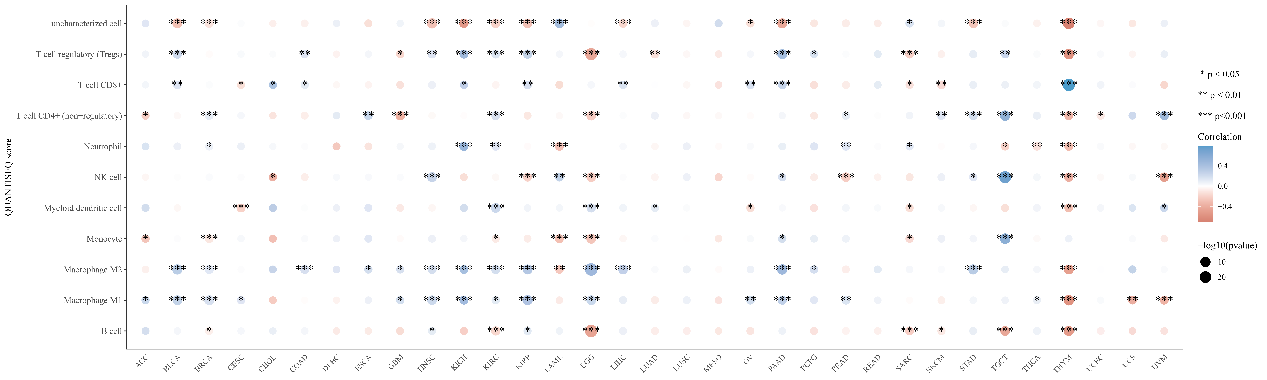


**Supplementary Fig. 5** The relationship between CD99 expression and tumor-infiltrating immune cells in pan-cancer by MCP-counter. *, *P*<0.05; **, *P*<0.01; ***, *P*<0.001.


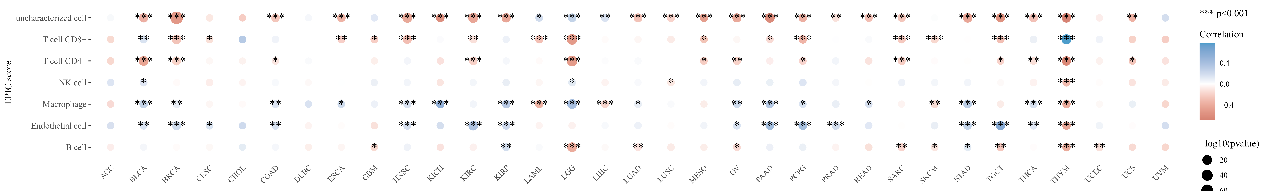


**Supplementary Fig. 6** The relationship between CD99 expression and tumor-infiltrating immune cells in pan-cancer by EPIC. *, *P*<0.05; **, *P*<0.01; ***, *P*<0.001.


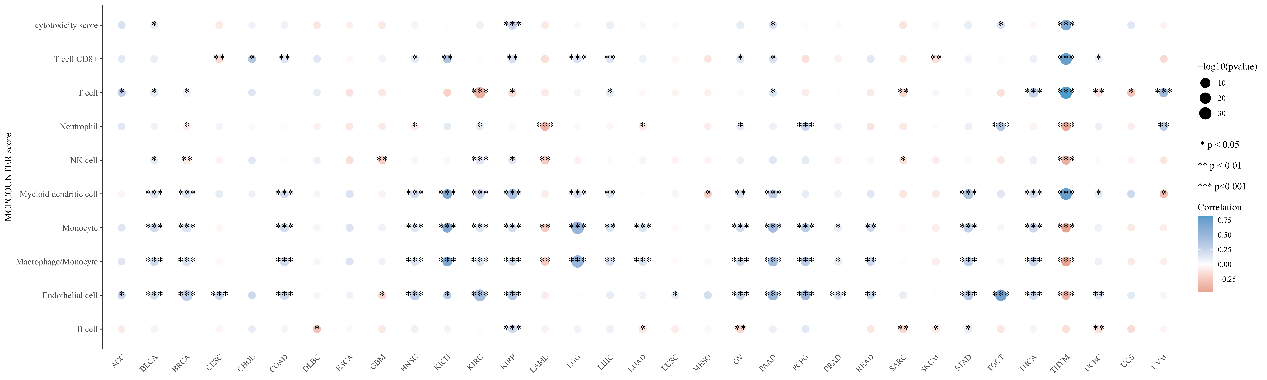


**Supplementary Fig. 7** The relationship between CD99 expression and tumor-infiltrating immune cells in pan-cancer by quanTIseq. *, *P*<0.05; **, *P*<0.01; ***, *P*<0.001.
